# Supplementary material
Source: PubMed Central journal article supplement (PMC11218624)
Supplement: aem.00142-24-s0001.pdf [file aem.00142-24-s0001.pdf]

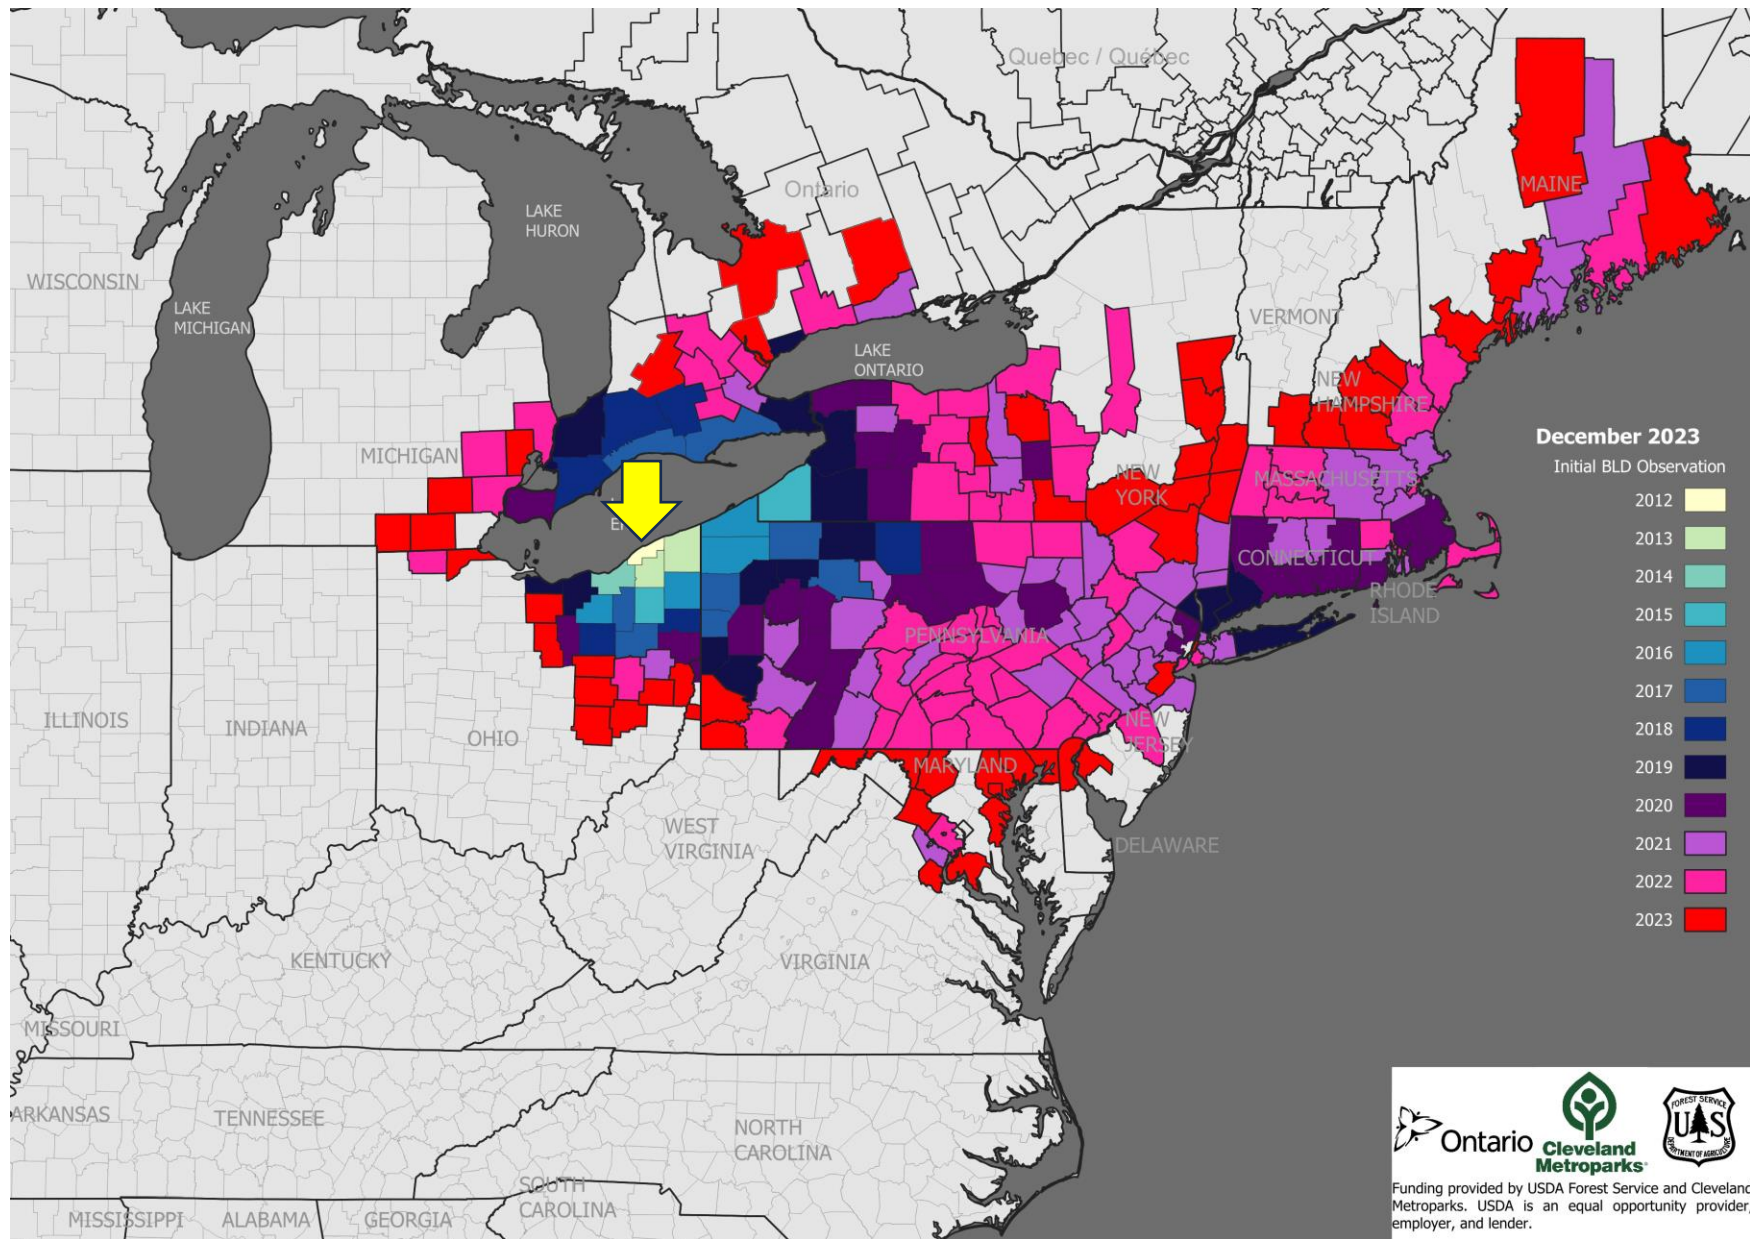

Figure S1: Map of confirmed presence of beech leaf disease (BLD) symptoms on *Fagus grandifolia* in North America as of December 2023. Symptoms were first noted in Lake County Ohio (arrow symbol) in 2012.

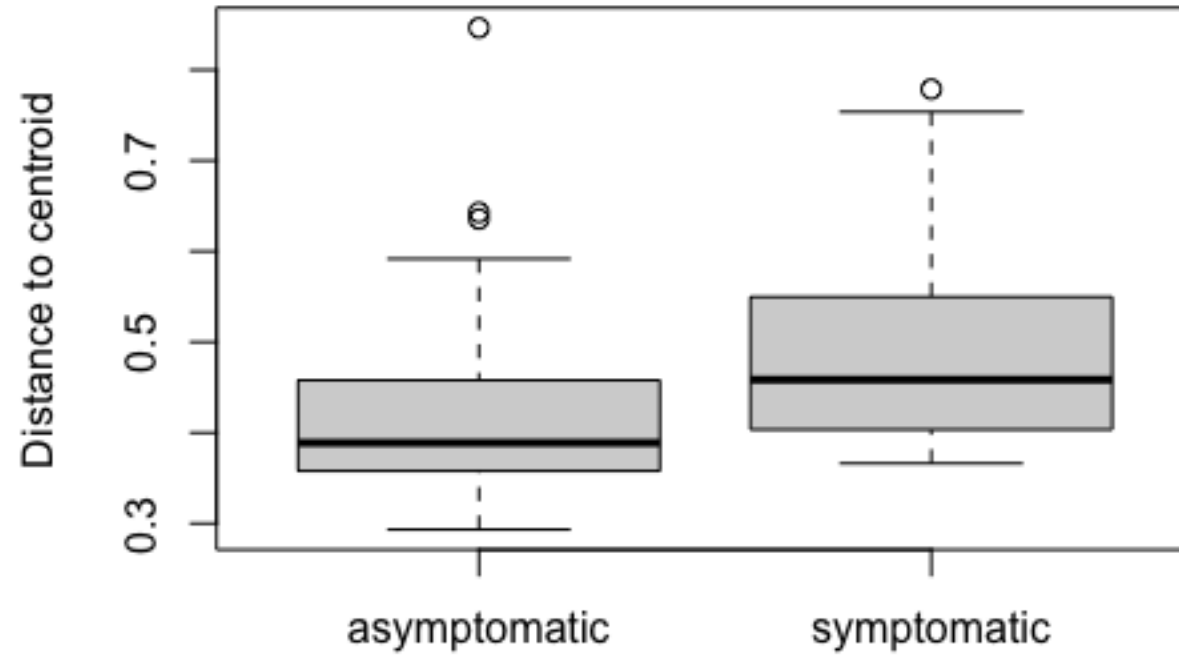

Figure S2. Box and whisker plot showing the distance to centroids for the bacterial leaf microbiome from sites asymptomatic or symptomatic for beech leaf disease (BLD).

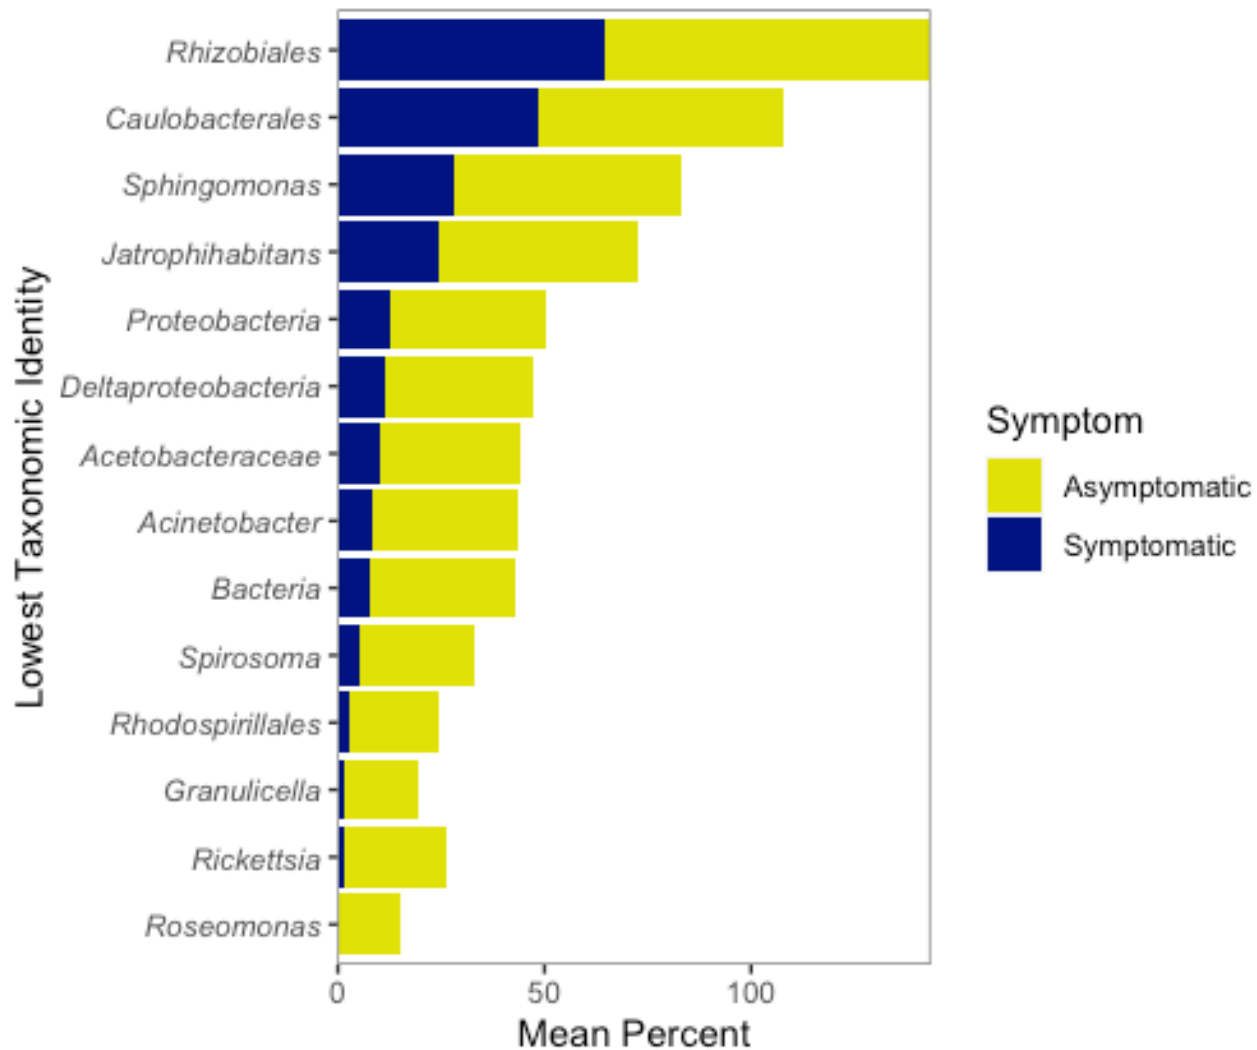

Figure S3. The lowest taxonomic identity for significant bacterial indicators of asymptomatic leaf tissue. The frequency that the taxa were found in leaf samples at asymptomatic or symptomatic sites is shown. If more than one zOTU had the same lowest taxonomic identity, the frequencies shown here are an average.

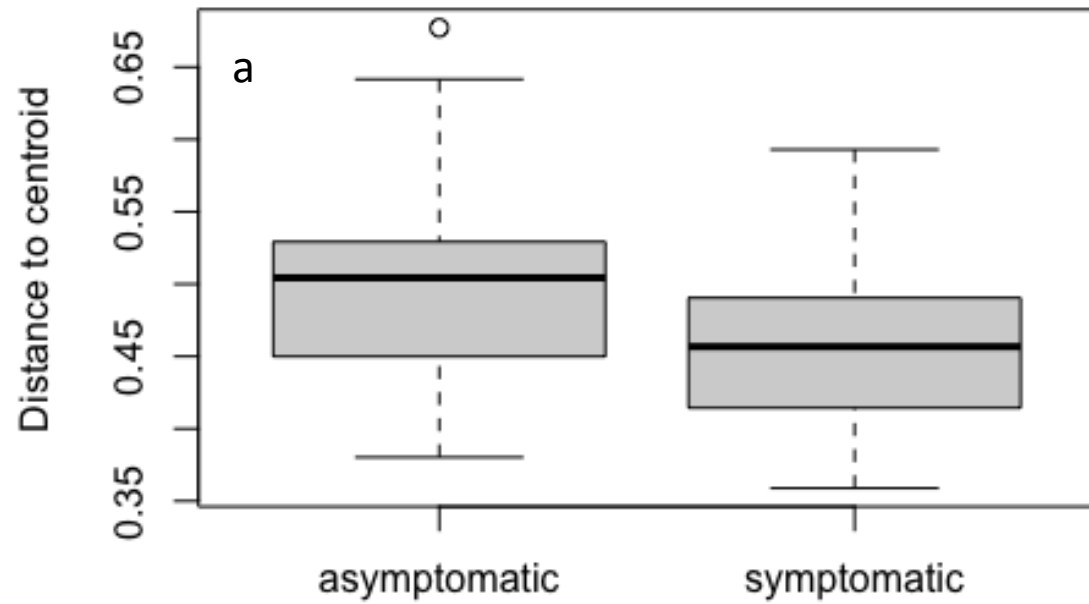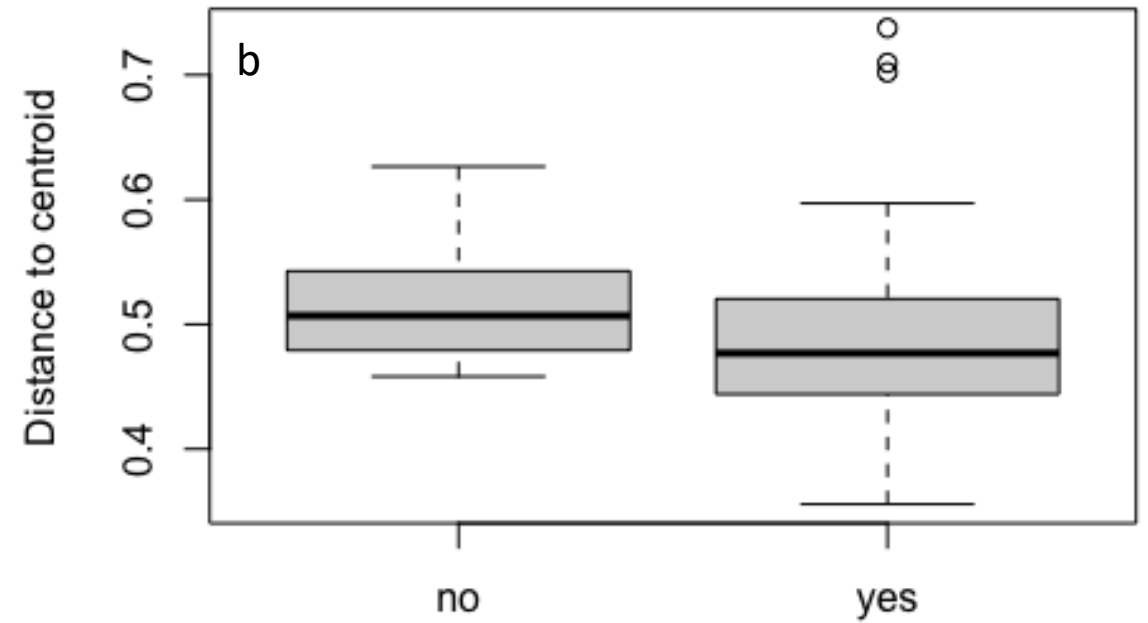

Figure S4. Box and whisker plot showing the distance to centroids for the fungal leaf microbiome from a) sites asymptomatic or symptomatic for beech leaf disease (BLD) and b) leaf samples with differing *L. crenetae* detection.
